# Supplementary material for: In Vitro and In Vivo Screening of Wild Bitter Melon Leaf for Anti-Inflammatory Activity against Cutibacterium acnes
Source: MDPI journal article supplement (doi:10.3390/molecules25184277), 2020-09-18
Supplement: s1 [file s1]

# In Vitro and In Vivo Screening of Wild Bitter Melon Leaf for Anti-Inflammatory Activity against *Cutibacterium acnes*

Lu-Te Chuang <sup>1</sup>, Ya-Hsin Shih <sup>2</sup>, Wen-Cheng Huang <sup>2</sup>, Lie-Chwen Lin <sup>3</sup>, Chin Hsu <sup>4</sup>, Jong-Ho Chyuan <sup>5</sup>, Tsung-Hsien Tsai <sup>6,\*</sup> and Po-Jung Tsai <sup>2,7,\*</sup>

- <sup>1</sup> Department of Biotechnology and Pharmaceutical Technology, Yuanpei University of Medical Technology, Hsinchu 3, Taiwan; ltchuang@mail.ypu.edu.tw  
<sup>2</sup> Department of Human Development and Family Studies, National Taiwan Normal University, Taipei 1, Taiwan; yayayungchieh@hotmail.com (Y.-H. S.); wencheng7373@gmail.com (W.-C. H.)  
<sup>3</sup> National Research Institute of Chinese Medicine, Ministry of Health and Welfare, Taipei 1, Taiwan; lclin@nricm.edu.tw  
<sup>4</sup> Department of Exercise Health Science, National Taiwan University of Sport, Taichung 4, Taiwan; jeanhhsu@ntupes.edu.tw  
<sup>5</sup> Hualien District Agricultural Research and Extension Station, Hualien 9, Taiwan; jonghoc@hdares.gov.tw  
<sup>6</sup> Department of Dermatology, Taipei Municipal Wan Fang Hospital and Taipei Medical University, Taipei 1, Taiwan  
<sup>7</sup> Program of Nutrition Science, School of Life Science, National Taiwan Normal University, Taipei 1, Taiwan  
\* Correspondence: thtsai2@yahoo.com.tw (T.-H. T.); pjtsai@ntnu.edu.tw (P.-J. T.); Tel.: +886-2-7749-1455 (P.-J. T.)

**Supplementary Materials:** The following are available online at [www.mdpi.com/xxx/s1](http://www.mdpi.com/xxx/s1), Figure S1: Gas chromatography–mass spectrometry (GC-MS) fragmentation patterns of  $\beta$ -ionone and dihydroactinidiolide.

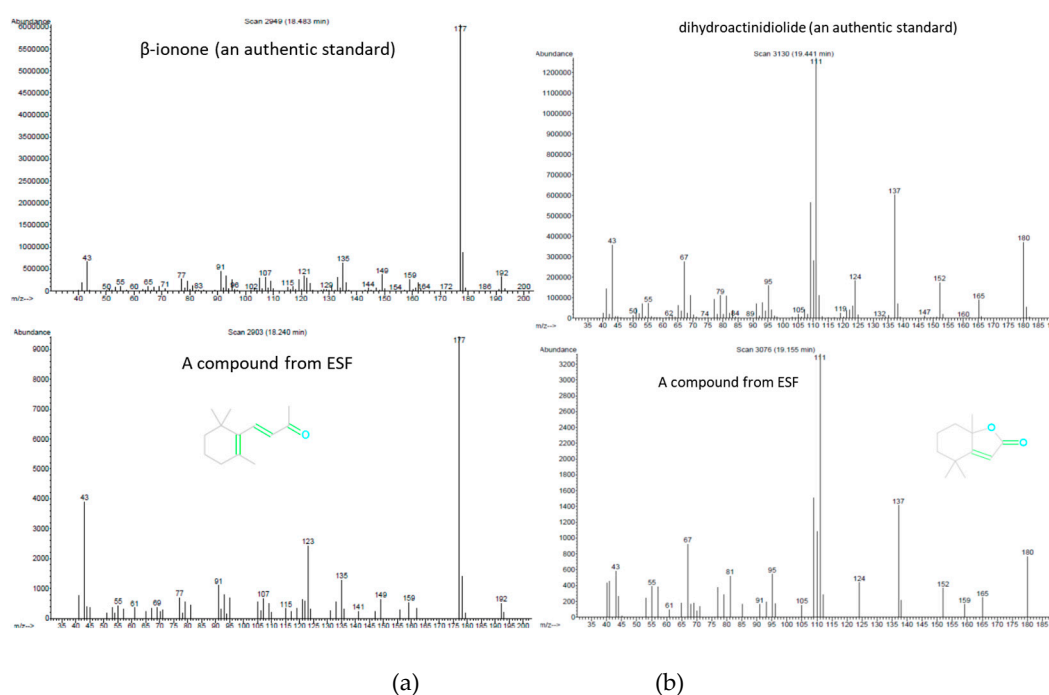

**Supplementary Figure 1.** Gas chromatography–mass spectrometry (GC-MS) fragmentation patterns of  $\beta$ -ionone (a) and dihydroactinidiolide (b). The validity of two compounds was examined using respective authentic standards.
